# Supplementary material for: Virulence Factors and Antimicrobial Resistance Profile of Escherichia Coli Isolated from Laying Hens in Italy
Source: MDPI journal article supplement (doi:10.3390/ani12141812), 2022-07-15
Supplement: s1 [file s1]

**Table S1.** The table reports the susceptibility of the 71 isolated *E. coli* strains to the considered antimicrobials. The results are expressed according to the breakpoint of CLSI and guidelines by CRAB.

| Antimicrobial drugs           | Disk concentration<br>n | S <sup>1</sup> |     | I <sup>2</sup> |    | R <sup>3</sup> |    |
|-------------------------------|-------------------------|----------------|-----|----------------|----|----------------|----|
|                               |                         | Number         | %   | Number         | %  | Number         | %  |
| nalidixic acid                | 30 µg                   | 34             | 48  | 2              | 3  | 35             | 49 |
| Aminosidine                   | 60 µg                   | 67             | 94  | 1              | 1  | 3              | 4  |
| amoxicillin/clavulanic acid   | 10/20 µg                | 54             | 76  | 8              | 11 | 9              | 13 |
| ampicillin                    | 10 µg                   | 40             | 56  | 4              | 6  | 27             | 38 |
| apramycin                     | 15 µg                   | 70             | 99  | 0              | 0  | 1              | 1  |
| cephalothin                   | 30 µg                   | 55             | 77  | 7              | 10 | 9              | 13 |
| ceftiofur                     | 30 µg                   | 71             | 100 | 0              | 0  | 0              | 0  |
| enrofloxacin                  | 5 µg                    | 68             | 96  | 2              | 3  | 1              | 1  |
| florfenicol                   | 30 µg                   | 71             | 100 | 0              | 0  | 0              | 0  |
| gentamicin                    | 10 µg                   | 68             | 96  | 0              | 0  | 3              | 4  |
| kanamycin                     | 30 µg                   | 67             | 94  | 1              | 1  | 3              | 4  |
| tetracycline                  | 30 µg                   | 53             | 75  | 1              | 1  | 17             | 24 |
| sulfamethoxazole/trimethoprim | 1.25/23.75 µg           | 65             | 92  | 0              | 0  | 4              | 6  |

<sup>1</sup>S = sensitive.

<sup>2</sup>I= increased exposure sensitivity.

<sup>3</sup>R=resistant.

**Table S2.** Antimicrobial-resistance profile of isolated *E. coli* strains, serogroups O2 and O88.

| Antimicrobial drugs           | O2 Strains     |                |                | O88 Strains    |                |                |
|-------------------------------|----------------|----------------|----------------|----------------|----------------|----------------|
|                               | S <sup>1</sup> | I <sup>2</sup> | R <sup>3</sup> | S <sup>1</sup> | I <sup>2</sup> | R <sup>3</sup> |
| nalidixic acid                | 2              | 0              | 13             | 9              | 0              | 0              |
| aminosidine                   | 14             | 1              | 0              | 8              | 0              | 1              |
| amoxicillin/clavulanic acid   | 14             | 1              | 0              | 9              | 0              | 0              |
| ampicillin                    | 10             | 0              | 5              | 6              | 1              | 2              |
| apramycin                     | 15             | 0              | 0              | 9              | 0              | 0              |
| cephalothin                   | 13             | 1              | 1              | 8              | 1              | 0              |
| ceftiofur                     | 15             | 0              | 0              | 9              | 0              | 0              |
| enrofloxacin                  | 14             | 1              | 0              | 9              | 0              | 0              |
| florfenicol                   | 15             | 0              | 0              | 9              | 0              | 0              |
| gentamicin                    | 15             | 0              | 0              | 9              | 0              | 0              |
| kanamycin                     | 15             | 0              | 0              | 8              | 1              | 0              |
| tetracycline                  | 14             | 0              | 1              | 8              | 0              | 1              |
| sulfamethoxazole/trimethoprim | 13             | 0              | 1              | 9              | 0              | 0              |

<sup>1</sup>S = number of sensitive strains.

<sup>2</sup>I= number of increased exposure sensitivity strains.

<sup>3</sup>R= number of resistant strains.

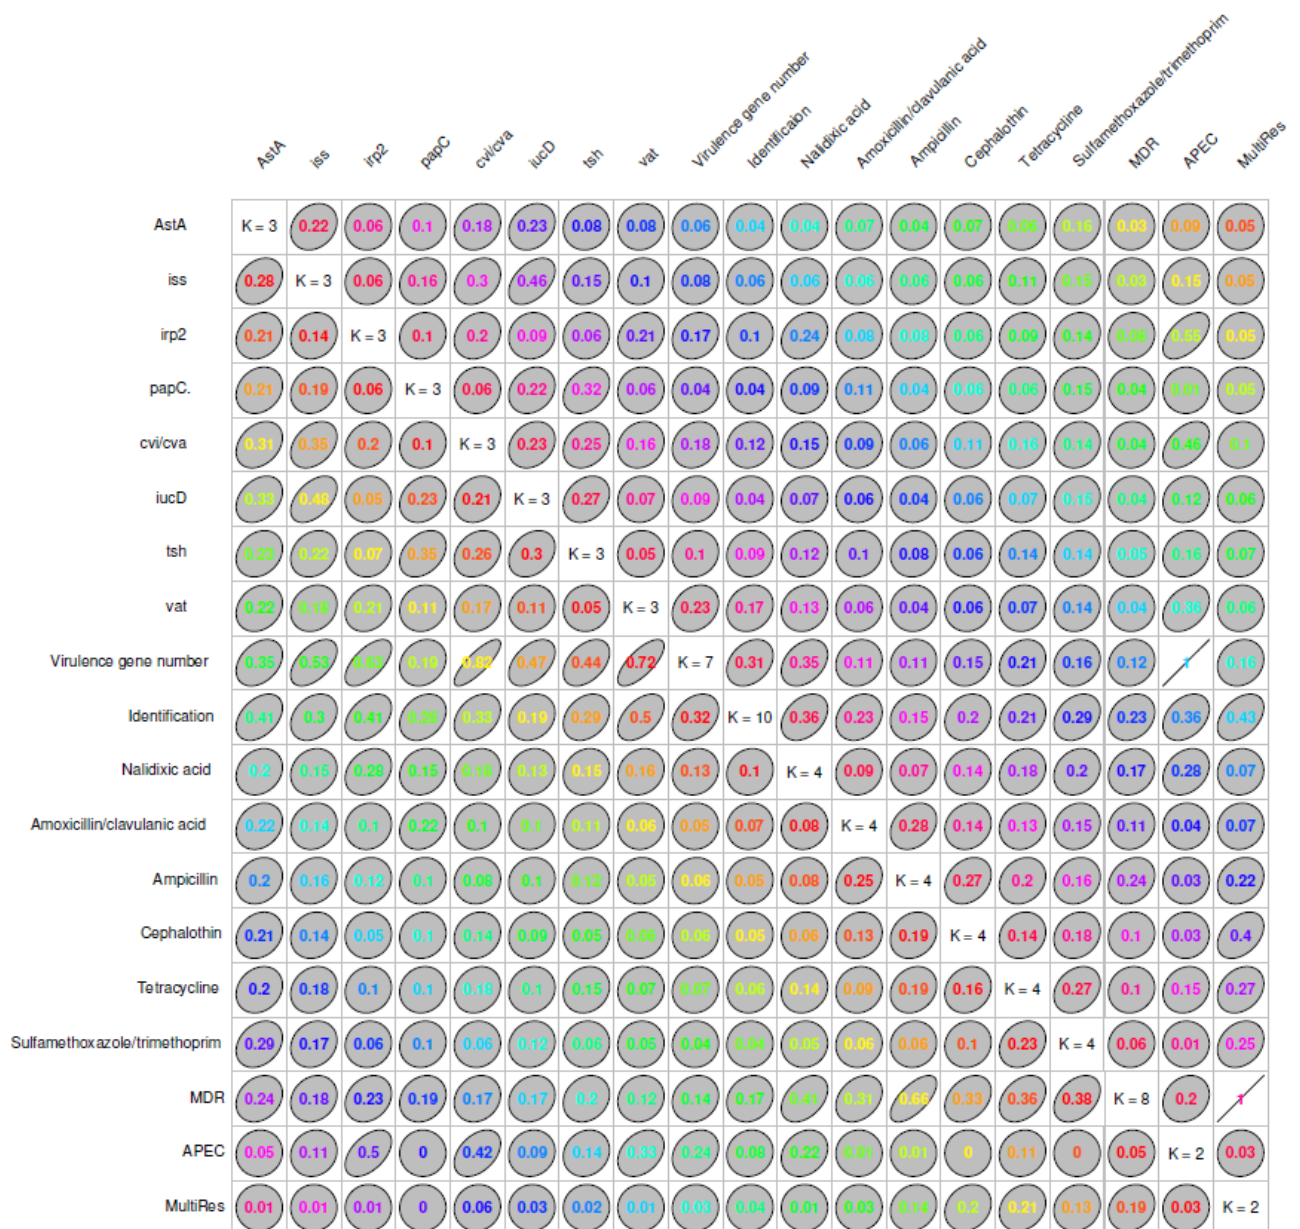

Figure S1. Statistical correlations between variables with Goodman – Kruskal tau.
